# Supplementary material for: Pharmacokinetic and metabolomic studies with a BIO 300 Oral Powder formulation in nonhuman primates
Source: Sci Rep. 2022 Aug 5;12:13475. doi: 10.1038/s41598-022-17807-7 (PMC9356050; doi:10.1038/s41598-022-17807-7)
Supplement: Supplementary file 1 — Supplementary Tables. [file 41598_2022_17807_MOESM1_ESM.pdf]

**Supplementary Table 2. Annotated metabolites/lipids as determined from the spectral search against NIST database and their identified fragments.**

| Name                                                                                   | m/z      | RT   | Synonym               | Adduct                               | Level | CID                                                                 |
|----------------------------------------------------------------------------------------|----------|------|-----------------------|--------------------------------------|-------|---------------------------------------------------------------------|
| 1-(1Z-Octadecenyl)-2-(5Z,8Z,11Z,14Z-eicosatetraenoyl)-sn-glycero-3-phosphoethanolamine | 752.5575 | 9.29 | C18(Plasm)-20:4 PE    | [M+H] <sup>+</sup>                   | 1     | 752.56, 611.54, 392.29, 261.27                                      |
| 1,2-Dipalmitoleoyl-sn-glycero-3-phosphocholine                                         | 752.5573 | 9.35 | 16:1 (DELTA.9-Cis) PC | [M+Na] <sup>+</sup>                  | 1     | 752.52, 693.45, 569.46, 146.98                                      |
| Methyl γ-linolenate                                                                    | 261.2222 | 5.65 | Methyl γ-linolenate   | [M+H-CH <sub>4</sub> O] <sup>+</sup> | 2     | 261.22, 149.13, 135.12, 123.12, 119.09, 109.10, 95.09, 81.07, 67.05 |
| Oleoyl ethylamide                                                                      | 310.3116 | 7.02 | Oleoyl ethylamide     | [M+H] <sup>+</sup>                   | 1     | 310.31, 268.26, 254.24, 226.21, 142.12, 72.04                       |
| Palmitamide                                                                            | 256.2648 | 6.2  | Palmitamide           | [M+H] <sup>+</sup>                   | 1     | 256.26, 186.18, 172.17, 130.12, 88.08                               |
| Phosphocholine                                                                         | 184.1708 | 6.38 | Phosphocholine        | [M+H] <sup>+</sup>                   | 1     | 184.07, 125.00, 98.98, 86.10                                        |
| Oleic acid                                                                             | 247.2432 | 6.38 | Oleic acid            | [M+H-2H <sub>2</sub> O] <sup>+</sup> | 1     | 247.24, 191.17, 135.11, 121.10, 93.077                              |
| Oleamide                                                                               | 563.5512 | 6.38 | Oleamide              | [2M+H] <sup>+</sup>                  | 2     | 563.55, 282.28, 265.25, 247.27, 163.15, 135.12                      |

Supplementary Table 3. A short list of the annotated metabolites/lipids and their test statistics

[illegible]

|          |      |                   |          | 200 mg/kg |             | 0.25 h vs. Pre |          | 0.5 h vs. Pre |             | 1 h vs. Pre |          | 2 h vs. Pre |             | 4 h vs. Pre |          | 8 h vs. Pre |             | 12 h vs. Pre |          | 24 h vs. Pre |             | 48 h vs. Pre |          |          |             |       |          |          |      |       |          |          |      |       |          |          |      |       |          |          |      |       |          |          |      |       |          |          |      |       |          |          |      |       |          |          |      |       |          |          |      |       |          |          |      |       |          |          |      |       |          |          |      |       |          |          |      |       |          |          |      |       |          |          |      |       |          |          |      |       |          |          |      |       |          |          |      |       |          |          |      |       |          |          |      |       |          |          |      |       |          |          |      |       |          |          |      |       |          |          |      |       |          |          |      |       |          |          |      |       |          |          |      |       |          |          |      |       |          |          |      |       |          |          |      |       |          |          |      |       |          |          |      |       |          |          |      |       |          |          |      |       |          |          |      |       |          |          |      |       |          |          |      |       |          |          |      |       |          |          |      |       |          |          |      |       |          |          |      |       |          |          |      |       |          |          |      |       |          |          |      |       |          |          |      |       |          |          |      |       |          |          |      |       |          |          |      |       |          |          |      |       |          |          |      |       |          |          |      |       |          |          |      |       |          |          |      |       |          |          |      |       |          |          |      |       |          |          |      |       |          |          |      |       |          |          |      |       |          |          |      |       |          |          |      |       |          |          |      |       |          |          |      |       |          |          |      |       |          |          |      |       |          |          |      |       |          |          |      |       |          |          |      |       |          |          |      |       |          |          |      |       |          |          |      |       |          |          |      |       |          |          |      |       |          |          |      |       |          |          |      |       |          |          |      |       |          |          |      |       |          |          |      |       |          |          |      |       |          |          |      |       |          |          |      |       |          |          |      |       |          |          |      |       |          |          |      |       |          |          |      |       |          |          |      |       |          |          |      |       |          |          |      |       |          |          |      |       |          |          |      |       |          |          |      |       |          |          |      |       |          |          |      |       |          |          |      |       |          |          |      |       |          |          |      |       |          |          |      |       |          |          |      |       |          |          |      |       |          |          |      |       |          |          |      |       |          |          |      |       |          |          |      |       |          |          |      |       |          |          |      |       |          |          |      |       |          |          |      |       |          |          |      |       |          |          |      |       |          |          |      |       |          |          |      |       |          |          |      |       |          |          |      |       |          |          |      |       |          |          |      |       |          |          |      |       |          |          |      |       |          |          |      |       |          |          |      |       |          |          |      |       |          |          |      |       |          |          |      |       |          |          |      |       |          |          |      |       |          |          |      |       |          |          |      |       |          |          |      |       |          |          |      |       |          |          |      |       |          |          |      |       |          |          |      |       |          |          |      |       |          |          |      |       |          |          |      |       |          |          |      |       |          |          |      |       |          |          |      |       |          |          |      |       |          |          |      |       |          |          |      |       |          |          |      |       |          |          |      |       |          |          |      |       |          |          |      |       |          |          |      |       |          |          |      |       |          |          |      |       |          |          |      |       |          |          |      |       |          |          |      |       |          |          |      |       |          |          |      |       |          |          |      |       |          |          |      |       |          |          |      |       |          |          |      |       |          |          |      |       |          |          |      |       |          |          |      |       |          |          |      |       |          |          |      |       |          |          |      |       |          |          |      |       |          |          |      |       |          |          |      |       |          |          |      |       |          |          |      |       |          |          |      |       |          |          |      |       |          |          |      |       |          |          |      |       |          |          |      |       |          |          |      |       |          |          |      |       |          |          |      |       |          |          |      |       |          |          |      |       |          |          |     |
|----------|------|-------------------|----------|-----------|-------------|----------------|----------|---------------|-------------|-------------|----------|-------------|-------------|-------------|----------|-------------|-------------|--------------|----------|--------------|-------------|--------------|----------|----------|-------------|-------|----------|----------|------|-------|----------|----------|------|-------|----------|----------|------|-------|----------|----------|------|-------|----------|----------|------|-------|----------|----------|------|-------|----------|----------|------|-------|----------|----------|------|-------|----------|----------|------|-------|----------|----------|------|-------|----------|----------|------|-------|----------|----------|------|-------|----------|----------|------|-------|----------|----------|------|-------|----------|----------|------|-------|----------|----------|------|-------|----------|----------|------|-------|----------|----------|------|-------|----------|----------|------|-------|----------|----------|------|-------|----------|----------|------|-------|----------|----------|------|-------|----------|----------|------|-------|----------|----------|------|-------|----------|----------|------|-------|----------|----------|------|-------|----------|----------|------|-------|----------|----------|------|-------|----------|----------|------|-------|----------|----------|------|-------|----------|----------|------|-------|----------|----------|------|-------|----------|----------|------|-------|----------|----------|------|-------|----------|----------|------|-------|----------|----------|------|-------|----------|----------|------|-------|----------|----------|------|-------|----------|----------|------|-------|----------|----------|------|-------|----------|----------|------|-------|----------|----------|------|-------|----------|----------|------|-------|----------|----------|------|-------|----------|----------|------|-------|----------|----------|------|-------|----------|----------|------|-------|----------|----------|------|-------|----------|----------|------|-------|----------|----------|------|-------|----------|----------|------|-------|----------|----------|------|-------|----------|----------|------|-------|----------|----------|------|-------|----------|----------|------|-------|----------|----------|------|-------|----------|----------|------|-------|----------|----------|------|-------|----------|----------|------|-------|----------|----------|------|-------|----------|----------|------|-------|----------|----------|------|-------|----------|----------|------|-------|----------|----------|------|-------|----------|----------|------|-------|----------|----------|------|-------|----------|----------|------|-------|----------|----------|------|-------|----------|----------|------|-------|----------|----------|------|-------|----------|----------|------|-------|----------|----------|------|-------|----------|----------|------|-------|----------|----------|------|-------|----------|----------|------|-------|----------|----------|------|-------|----------|----------|------|-------|----------|----------|------|-------|----------|----------|------|-------|----------|----------|------|-------|----------|----------|------|-------|----------|----------|------|-------|----------|----------|------|-------|----------|----------|------|-------|----------|----------|------|-------|----------|----------|------|-------|----------|----------|------|-------|----------|----------|------|-------|----------|----------|------|-------|----------|----------|------|-------|----------|----------|------|-------|----------|----------|------|-------|----------|----------|------|-------|----------|----------|------|-------|----------|----------|------|-------|----------|----------|------|-------|----------|----------|------|-------|----------|----------|------|-------|----------|----------|------|-------|----------|----------|------|-------|----------|----------|------|-------|----------|----------|------|-------|----------|----------|------|-------|----------|----------|------|-------|----------|----------|------|-------|----------|----------|------|-------|----------|----------|------|-------|----------|----------|------|-------|----------|----------|------|-------|----------|----------|------|-------|----------|----------|------|-------|----------|----------|------|-------|----------|----------|------|-------|----------|----------|------|-------|----------|----------|------|-------|----------|----------|------|-------|----------|----------|------|-------|----------|----------|------|-------|----------|----------|------|-------|----------|----------|------|-------|----------|----------|------|-------|----------|----------|------|-------|----------|----------|------|-------|----------|----------|------|-------|----------|----------|------|-------|----------|----------|------|-------|----------|----------|------|-------|----------|----------|------|-------|----------|----------|------|-------|----------|----------|------|-------|----------|----------|------|-------|----------|----------|------|-------|----------|----------|------|-------|----------|----------|------|-------|----------|----------|------|-------|----------|----------|------|-------|----------|----------|------|-------|----------|----------|------|-------|----------|----------|------|-------|----------|----------|------|-------|----------|----------|------|-------|----------|----------|------|-------|----------|----------|------|-------|----------|----------|------|-------|----------|----------|------|-------|----------|----------|------|-------|----------|----------|------|-------|----------|----------|------|-------|----------|----------|------|-------|----------|----------|------|-------|----------|----------|------|-------|----------|----------|------|-------|----------|----------|------|-------|----------|----------|------|-------|----------|----------|------|-------|----------|----------|------|-------|----------|----------|------|-------|----------|----------|------|-------|----------|----------|------|-------|----------|----------|------|-------|----------|----------|------|-------|----------|----------|------|-------|----------|----------|------|-------|----------|----------|------|-------|----------|----------|------|-------|----------|----------|------|-------|----------|----------|------|-------|----------|----------|------|-------|----------|----------|------|-------|----------|----------|------|-------|----------|----------|------|-------|----------|----------|------|-------|----------|----------|------|-------|----------|----------|------|-------|----------|----------|------|-------|----------|----------|------|-------|----------|----------|-----|
| m/z      | RT   | Name              | p-value  | FDR       | Fold Change | Log2(FC)       | p-value  | FDR           | Fold Change | Log2(FC)    | p-value  | FDR         | Fold Change | Log2(FC)    | p-value  | FDR         | Fold Change | Log2(FC)     | p-value  | FDR          | Fold Change | Log2(FC)     | p-value  | FDR      | Fold Change |       |          |          |      |       |          |          |      |       |          |          |      |       |          |          |      |       |          |          |      |       |          |          |      |       |          |          |      |       |          |          |      |       |          |          |      |       |          |          |      |       |          |          |      |       |          |          |      |       |          |          |      |       |          |          |      |       |          |          |      |       |          |          |      |       |          |          |      |       |          |          |      |       |          |          |      |       |          |          |      |       |          |          |      |       |          |          |      |       |          |          |      |       |          |          |      |       |          |          |      |       |          |          |      |       |          |          |      |       |          |          |      |       |          |          |      |       |          |          |      |       |          |          |      |       |          |          |      |       |          |          |      |       |          |          |      |       |          |          |      |       |          |          |      |       |          |          |      |       |          |          |      |       |          |          |      |       |          |          |      |       |          |          |      |       |          |          |      |       |          |          |      |       |          |          |      |       |          |          |      |       |          |          |      |       |          |          |      |       |          |          |      |       |          |          |      |       |          |          |      |       |          |          |      |       |          |          |      |       |          |          |      |       |          |          |      |       |          |          |      |       |          |          |      |       |          |          |      |       |          |          |      |       |          |          |      |       |          |          |      |       |          |          |      |       |          |          |      |       |          |          |      |       |          |          |      |       |          |          |      |       |          |          |      |       |          |          |      |       |          |          |      |       |          |          |      |       |          |          |      |       |          |          |      |       |          |          |      |       |          |          |      |       |          |          |      |       |          |          |      |       |          |          |      |       |          |          |      |       |          |          |      |       |          |          |      |       |          |          |      |       |          |          |      |       |          |          |      |       |          |          |      |       |          |          |      |       |          |          |      |       |          |          |      |       |          |          |      |       |          |          |      |       |          |          |      |       |          |          |      |       |          |          |      |       |          |          |      |       |          |          |      |       |          |          |      |       |          |          |      |       |          |          |      |       |          |          |      |       |          |          |      |       |          |          |      |       |          |          |      |       |          |          |      |       |          |          |      |       |          |          |      |       |          |          |      |       |          |          |      |       |          |          |      |       |          |          |      |       |          |          |      |       |          |          |      |       |          |          |      |       |          |          |      |       |          |          |      |       |          |          |      |       |          |          |      |       |          |          |      |       |          |          |      |       |          |          |      |       |          |          |      |       |          |          |      |       |          |          |      |       |          |          |      |       |          |          |      |       |          |          |      |       |          |          |      |       |          |          |      |       |          |          |      |       |          |          |      |       |          |          |      |       |          |          |      |       |          |          |      |       |          |          |      |       |          |          |      |       |          |          |      |       |          |          |      |       |          |          |      |       |          |          |      |       |          |          |      |       |          |          |      |       |          |          |      |       |          |          |      |       |          |          |      |       |          |          |      |       |          |          |      |       |          |          |      |       |          |          |      |       |          |          |      |       |          |          |      |       |          |          |      |       |          |          |      |       |          |          |      |       |          |          |      |       |          |          |      |       |          |          |      |       |          |          |      |       |          |          |      |       |          |          |      |       |          |          |      |       |          |          |      |       |          |          |      |       |          |          |      |       |          |          |      |       |          |          |      |       |          |          |      |       |          |          |      |       |          |          |      |       |          |          |      |       |          |          |      |       |          |          |      |       |          |          |      |       |          |          |      |       |          |          |      |       |          |          |      |       |          |          |      |       |          |          |      |       |          |          |      |       |          |          |      |       |          |          |     |
| 310.1116 | 7.02 | Oleoyl ethylamide | 9.71E-04 | 2.95E-01  | 0.82        | -0.29          | 3.95E-02 | 8.90E-01      | 0.71        | -0.49       | 2.30E-04 | 3.52E-01    | 0.77        | -0.38       | 8.08E-02 | 1.00E+00    | 0.86        | -0.22        | 2.71E-03 | 9.60E-01     | 0.83        | -0.26        | 6.64E-02 | 9.98E-01 | 0.74        | -0.44 | 1.24E-01 | 9.45E-01 | 1.06 | 0.08  | 8.06E-02 | 9.98E-01 | 0.74 | -0.44 | 5.90E-03 | 9.94E-01 | 0.82 | -0.29 |          |          |      |       |          |          |      |       |          |          |      |       |          |          |      |       |          |          |      |       |          |          |      |       |          |          |      |       |          |          |      |       |          |          |      |       |          |          |      |       |          |          |      |       |          |          |      |       |          |          |      |       |          |          |      |       |          |          |      |       |          |          |      |       |          |          |      |       |          |          |      |       |          |          |      |       |          |          |      |       |          |          |      |       |          |          |      |       |          |          |      |       |          |          |      |       |          |          |      |       |          |          |      |       |          |          |      |       |          |          |      |       |          |          |      |       |          |          |      |       |          |          |      |       |          |          |      |       |          |          |      |       |          |          |      |       |          |          |      |       |          |          |      |       |          |          |      |       |          |          |      |       |          |          |      |       |          |          |      |       |          |          |      |       |          |          |      |       |          |          |      |       |          |          |      |       |          |          |      |       |          |          |      |       |          |          |      |       |          |          |      |       |          |          |      |       |          |          |      |       |          |          |      |       |          |          |      |       |          |          |      |       |          |          |      |       |          |          |      |       |          |          |      |       |          |          |      |       |          |          |      |       |          |          |      |       |          |          |      |       |          |          |      |       |          |          |      |       |          |          |      |       |          |          |      |       |          |          |      |       |          |          |      |       |          |          |      |       |          |          |      |       |          |          |      |       |          |          |      |       |          |          |      |       |          |          |      |       |          |          |      |       |          |          |      |       |          |          |      |       |          |          |      |       |          |          |      |       |          |          |      |       |          |          |      |       |          |          |      |       |          |          |      |       |          |          |      |       |          |          |      |       |          |          |      |       |          |          |      |       |          |          |      |       |          |          |      |       |          |          |      |       |          |          |      |       |          |          |      |       |          |          |      |       |          |          |      |       |          |          |      |       |          |          |      |       |          |          |      |       |          |          |      |       |          |          |      |       |          |          |      |       |          |          |      |       |          |          |      |       |          |          |      |       |          |          |      |       |          |          |      |       |          |          |      |       |          |          |      |       |          |          |      |       |          |          |      |       |          |          |      |       |          |          |      |       |          |          |      |       |          |          |      |       |          |          |      |       |          |          |      |       |          |          |      |       |          |          |      |       |          |          |      |       |          |          |      |       |          |          |      |       |          |          |      |       |          |          |      |       |          |          |      |       |          |          |      |       |          |          |      |       |          |          |      |       |          |          |      |       |          |          |      |       |          |          |      |       |          |          |      |       |          |          |      |       |          |          |      |       |          |          |      |       |          |          |      |       |          |          |      |       |          |          |      |       |          |          |      |       |          |          |      |       |          |          |      |       |          |          |      |       |          |          |      |       |          |          |      |       |          |          |      |       |          |          |      |       |          |          |      |       |          |          |      |       |          |          |      |       |          |          |      |       |          |          |      |       |          |          |      |       |          |          |      |       |          |          |      |       |          |          |      |       |          |          |      |       |          |          |      |       |          |          |      |       |          |          |      |       |          |          |      |       |          |          |      |       |          |          |      |       |          |          |      |       |          |          |      |       |          |          |      |       |          |          |      |       |          |          |      |       |          |          |      |       |          |          |      |       |          |          |      |       |          |          |      |       |          |          |      |       |          |          |      |       |          |          |      |       |          |          |      |       |          |          |      |       |          |          |      |       |          |          |     |
| 256.2648 | 6.2  | PSE               | 0.000000 | 0.89E-01  | 0.81        | -0.32          | 4.65E-02 | 8.90E-01      | 0.72        | -0.49       | 4.34E-01 | 4.11E-01    | 0.94        | -0.20       | 9.69E-02 | 9.98E-01    | 0.81        | -0.07        | 7.41E-02 | 9.98E-01     | 0.81        | -0.07        | 7.41E-02 | 9.98E-01 | 0.81        | -0.07 | 7.41E-02 | 9.98E-01 | 0.81 | -0.07 | 7.41E-02 | 9.98E-01 | 0.81 | -0.07 | 7.41E-02 | 9.98E-01 | 0.81 | -0.07 | 7.41E-02 | 9.98E-01 | 0.81 | -0.07 | 7.41E-02 | 9.98E-01 | 0.81 | -0.07 | 7.41E-02 | 9.98E-01 | 0.81 | -0.07 | 7.41E-02 | 9.98E-01 | 0.81 | -0.07 | 7.41E-02 | 9.98E-01 | 0.81 | -0.07 | 7.41E-02 | 9.98E-01 | 0.81 | -0.07 | 7.41E-02 | 9.98E-01 | 0.81 | -0.07 | 7.41E-02 | 9.98E-01 | 0.81 | -0.07 | 7.41E-02 | 9.98E-01 | 0.81 | -0.07 | 7.41E-02 | 9.98E-01 | 0.81 | -0.07 | 7.41E-02 | 9.98E-01 | 0.81 | -0.07 | 7.41E-02 | 9.98E-01 | 0.81 | -0.07 | 7.41E-02 | 9.98E-01 | 0.81 | -0.07 | 7.41E-02 | 9.98E-01 | 0.81 | -0.07 | 7.41E-02 | 9.98E-01 | 0.81 | -0.07 | 7.41E-02 | 9.98E-01 | 0.81 | -0.07 | 7.41E-02 | 9.98E-01 | 0.81 | -0.07 | 7.41E-02 | 9.98E-01 | 0.81 | -0.07 | 7.41E-02 | 9.98E-01 | 0.81 | -0.07 | 7.41E-02 | 9.98E-01 | 0.81 | -0.07 | 7.41E-02 | 9.98E-01 | 0.81 | -0.07 | 7.41E-02 | 9.98E-01 | 0.81 | -0.07 | 7.41E-02 | 9.98E-01 | 0.81 | -0.07 | 7.41E-02 | 9.98E-01 | 0.81 | -0.07 | 7.41E-02 | 9.98E-01 | 0.81 | -0.07 | 7.41E-02 | 9.98E-01 | 0.81 | -0.07 | 7.41E-02 | 9.98E-01 | 0.81 | -0.07 | 7.41E-02 | 9.98E-01 | 0.81 | -0.07 | 7.41E-02 | 9.98E-01 | 0.81 | -0.07 | 7.41E-02 | 9.98E-01 | 0.81 | -0.07 | 7.41E-02 | 9.98E-01 | 0.81 | -0.07 | 7.41E-02 | 9.98E-01 | 0.81 | -0.07 | 7.41E-02 | 9.98E-01 | 0.81 | -0.07 | 7.41E-02 | 9.98E-01 | 0.81 | -0.07 | 7.41E-02 | 9.98E-01 | 0.81 | -0.07 | 7.41E-02 | 9.98E-01 | 0.81 | -0.07 | 7.41E-02 | 9.98E-01 | 0.81 | -0.07 | 7.41E-02 | 9.98E-01 | 0.81 | -0.07 | 7.41E-02 | 9.98E-01 | 0.81 | -0.07 | 7.41E-02 | 9.98E-01 | 0.81 | -0.07 | 7.41E-02 | 9.98E-01 | 0.81 | -0.07 | 7.41E-02 | 9.98E-01 | 0.81 | -0.07 | 7.41E-02 | 9.98E-01 | 0.81 | -0.07 | 7.41E-02 | 9.98E-01 | 0.81 | -0.07 | 7.41E-02 | 9.98E-01 | 0.81 | -0.07 | 7.41E-02 | 9.98E-01 | 0.81 | -0.07 | 7.41E-02 | 9.98E-01 | 0.81 | -0.07 | 7.41E-02 | 9.98E-01 | 0.81 | -0.07 | 7.41E-02 | 9.98E-01 | 0.81 | -0.07 | 7.41E-02 | 9.98E-01 | 0.81 | -0.07 | 7.41E-02 | 9.98E-01 | 0.81 | -0.07 | 7.41E-02 | 9.98E-01 | 0.81 | -0.07 | 7.41E-02 | 9.98E-01 | 0.81 | -0.07 | 7.41E-02 | 9.98E-01 | 0.81 | -0.07 | 7.41E-02 | 9.98E-01 | 0.81 | -0.07 | 7.41E-02 | 9.98E-01 | 0.81 | -0.07 | 7.41E-02 | 9.98E-01 | 0.81 | -0.07 | 7.41E-02 | 9.98E-01 | 0.81 | -0.07 | 7.41E-02 | 9.98E-01 | 0.81 | -0.07 | 7.41E-02 | 9.98E-01 | 0.81 | -0.07 | 7.41E-02 | 9.98E-01 | 0.81 | -0.07 | 7.41E-02 | 9.98E-01 | 0.81 | -0.07 | 7.41E-02 | 9.98E-01 | 0.81 | -0.07 | 7.41E-02 | 9.98E-01 | 0.81 | -0.07 | 7.41E-02 | 9.98E-01 | 0.81 | -0.07 | 7.41E-02 | 9.98E-01 | 0.81 | -0.07 | 7.41E-02 | 9.98E-01 | 0.81 | -0.07 | 7.41E-02 | 9.98E-01 | 0.81 | -0.07 | 7.41E-02 | 9.98E-01 | 0.81 | -0.07 | 7.41E-02 | 9.98E-01 | 0.81 | -0.07 | 7.41E-02 | 9.98E-01 | 0.81 | -0.07 | 7.41E-02 | 9.98E-01 | 0.81 | -0.07 | 7.41E-02 | 9.98E-01 | 0.81 | -0.07 | 7.41E-02 | 9.98E-01 | 0.81 | -0.07 | 7.41E-02 | 9.98E-01 | 0.81 | -0.07 | 7.41E-02 | 9.98E-01 | 0.81 | -0.07 | 7.41E-02 | 9.98E-01 | 0.81 | -0.07 | 7.41E-02 | 9.98E-01 | 0.81 | -0.07 | 7.41E-02 | 9.98E-01 | 0.81 | -0.07 | 7.41E-02 | 9.98E-01 | 0.81 | -0.07 | 7.41E-02 | 9.98E-01 | 0.81 | -0.07 | 7.41E-02 | 9.98E-01 | 0.81 | -0.07 | 7.41E-02 | 9.98E-01 | 0.81 | -0.07 | 7.41E-02 | 9.98E-01 | 0.81 | -0.07 | 7.41E-02 | 9.98E-01 | 0.81 | -0.07 | 7.41E-02 | 9.98E-01 | 0.81 | -0.07 | 7.41E-02 | 9.98E-01 | 0.81 | -0.07 | 7.41E-02 | 9.98E-01 | 0.81 | -0.07 | 7.41E-02 | 9.98E-01 | 0.81 | -0.07 | 7.41E-02 | 9.98E-01 | 0.81 | -0.07 | 7.41E-02 | 9.98E-01 | 0.81 | -0.07 | 7.41E-02 | 9.98E-01 | 0.81 | -0.07 | 7.41E-02 | 9.98E-01 | 0.81 | -0.07 | 7.41E-02 | 9.98E-01 | 0.81 | -0.07 | 7.41E-02 | 9.98E-01 | 0.81 | -0.07 | 7.41E-02 | 9.98E-01 | 0.81 | -0.07 | 7.41E-02 | 9.98E-01 | 0.81 | -0.07 | 7.41E-02 | 9.98E-01 | 0.81 | -0.07 | 7.41E-02 | 9.98E-01 | 0.81 | -0.07 | 7.41E-02 | 9.98E-01 | 0.81 | -0.07 | 7.41E-02 | 9.98E-01 | 0.81 | -0.07 | 7.41E-02 | 9.98E-01 | 0.81 | -0.07 | 7.41E-02 | 9.98E-01 | 0.81 | -0.07 | 7.41E-02 | 9.98E-01 | 0.81 | -0.07 | 7.41E-02 | 9.98E-01 | 0.81 | -0.07 | 7.41E-02 | 9.98E-01 | 0.81 | -0.07 | 7.41E-02 | 9.98E-01 | 0.81 | -0.07 | 7.41E-02 | 9.98E-01 | 0.81 | -0.07 | 7.41E-02 | 9.98E-01 | 0.81 | -0.07 | 7.41E-02 | 9.98E-01 | 0.81 | -0.07 | 7.41E-02 | 9.98E-01 | 0.81 | -0.07 | 7.41E-02 | 9.98E-01 | 0.81 | -0.07 | 7.41E-02 | 9.98E-01 | 0.81 | -0.07 | 7.41E-02 | 9.98E-01 | 0.81 | -0.07 | 7.41E-02 | 9.98E-01 | 0.81 | -0.07 | 7.41E-02 | 9.98E-01 | 0.81 | -0.07 | 7.41E-02 | 9.98E-01 | 0.81 | -0.07 | 7.41E-02 | 9.98E-01 | 0.81 | -0.07 | 7.41E-02 | 9.98E-01 | 0.81 | -0.07 | 7.41E-02 | 9.98E-01 | 0.81 | -0.07 | 7.41E-02 | 9.98E-01 | 0.81 | -0.07 | 7.41E-02 | 9.98E-01 | 0.81 | -0.07 | 7.41E-02 | 9.98E-01 | 0.81 | -0.07 | 7.41E-02 | 9.98E-01 | 0.81 | -0.07 | 7.41E-02 | 9.98E-01 | 0.81 | -0.07 | 7.41E-02 | 9.98E-01 | 0.81 | -0.07 | 7.41E-02 | 9.98E-01 | 0.81 | -0.07 | 7.41E-02 | 9.98E-01 | 0.81 | -0.07 | 7.41E-02 | 9.98E-01 | 0.81 | -0.07 | 7.41E-02 | 9.98E-01 | 0.81 | -0.07 | 7.41E-02 | 9.98E-01 | 0.81 | -0.07 | 7.41E-02 | 9.98E-01 | 0.81 | -0.07 | 7.41E-02 | 9.98E-01 | 0.81 | -0.07 | 7.41E-02 | 9.98E-01 | 0.81 | -0.07 | 7.41E-02 | 9.98E-01 | 0.81 | -0.07 | 7.41E-02 | 9.98E-01 | 0.81 | -0.07 | 7.41E-02 | 9.98E-01 | 0.81 | -0.07 | 7.41E-02 | 9.98E-01 | 0.81 | -0.07 | 7.41E-02 | 9.98E-01 | 0.81 | -0.07 | 7.41E-02 | 9.98E-01 | 0.81 | -0.07 | 7.41E-02 | 9.98E-01 | 0.81 | -0.07 | 7.41E-02 | 9.98E-01 | 0.81 | -0.07 | 7.41E-02 | 9.98E-01 | 0.81 | -0.07 | 7.41E-02 | 9.98E-01 | 0.81 | -0.07 | 7.41E-02 | 9.98E-01 | 0.81 | -0.07 | 7.41E-02 | 9.98E-01 | 0.81 | -0.07 | 7.41E-02 | 9.98E-01 | 0.81 | -0.07 | 7.41E-02 | 9.98E-01 | 0.81 | -0.07 | 7.41E-02 | 9.98E-01 | 0.81 | -0.07 | 7.41E-02 | 9.98E-01 | 0.81 | -0.07 | 7.41E-02 | 9.98E-01 | 0.81 | -0.07 | 7.41E-02 | 9.98E-01 | 0.81 | -0.07 | 7.41E-02 | 9.98E-01 | 0.81 | -0.07 | 7.41E-02 | 9.98E-01 | 0.81 | -0.07 | 7.41E-02 | 9.98E-01 | 0.81 | -0.07 | 7.41E-02 | 9.98E-01 | 0.81 | -0.07 | 7.41E-02 | 9.98E-01 | 0.81 | -0.07 | 7.41E-02 | 9.98E-01 | 0.81 | -0.07 | 7.41E-02 | 9.98E-01 | 0.81 | -0.07 | 7.41E-02 | 9.98E-01 | 0.81 | -0.07 | 7.41E-02 | 9.98E-01 | 0.81 | -0.07 | 7.41E-02 | 9.98E-01 | 0.81 | -0.07 | 7.41E-02 | 9.98E-01 | 0.81 | -0.07 | 7.41E-02 | 9.98E-01 | 0.81 | -0.07 | 7.41E-02 | 9.98E-01 | 0.81 | -0.07 | 7.41E-02 | 9.98E-01 | 0.81 | -0.07 | 7.41E-02 | 9.98E-01 | 0.81 | -0.07 | 7.41E-02 | 9.98E-01 | 0.81 | -0.07 | 7.41E-02 | 9.98E-01 | 0.81 | -0.07 | 7.41E-02 | 9.98E-01 | 0.81 | -0.07 | 7.41E-02 | 9.98E-01 | 0.81 | -0.07 | 7.41E-02 | 9.98E-01 | 0.81 | -0.07 | 7.41E-02 | 9.98E-01 | 0.81 | -0.07 | 7.41E-02 | 9.98E-01 | 0.8 |

Supplementary Table 4A. Metabolomics mode mummichog 2.06 software pathway analysis results for BIO 300 (100 mg/kg and 200 mg/kg) treated across time.

| Pathway                                                   | 0.25 h vs. Pre |            | 0.5 h vs. Pre |          | 1 h vs. Pre  |          | 2 h vs. Pre  |          | 4 h vs. Pre  |          | 8 h vs. Pre  |          | 12 h vs. Pre |          | 24 h vs. Pre |          | 48 h vs. Pre |          | 0.25 h vs. Pre |          | 0.5 h vs. Pre |          | 1 h vs. Pre  |          | 2 h vs. Pre  |          | 4 h vs. Pre  |         | 8 h vs. Pre  |         | 12 h vs. Pre |          | 24 h vs. Pre |          | 48 h vs. Pre |  |
|-----------------------------------------------------------|----------------|------------|---------------|----------|--------------|----------|--------------|----------|--------------|----------|--------------|----------|--------------|----------|--------------|----------|--------------|----------|----------------|----------|---------------|----------|--------------|----------|--------------|----------|--------------|---------|--------------|---------|--------------|----------|--------------|----------|--------------|--|
|                                                           | p-value        |            | p-value       |          | p-value      |          | p-value      |          | p-value      |          | p-value      |          | p-value      |          | p-value      |          | p-value      |          | p-value        |          | p-value       |          | p-value      |          | p-value      |          | p-value      |         | p-value      |         | p-value      |          | p-value      |          | p-value      |  |
|                                                           | overlap size   | p-value    | overlap size  | p-value  | overlap size | p-value  | overlap size | p-value  | overlap size | p-value  | overlap size | p-value  | overlap size | p-value  | overlap size | p-value  | overlap size | p-value  | overlap size   | p-value  | overlap size  | p-value  | overlap size | p-value  | overlap size | p-value  | overlap size | p-value | overlap size | p-value | overlap size | p-value  | overlap size | p-value  |              |  |
| Fatty acid activation                                     | -              | -          | -             | -        | 5(15)        | 9.24E-04 | 7(15)        | 0.001512 | 13(15)       | 1.68E-04 | 12(15)       | 9.24E-04 | 9(15)        | 0.001765 | 9(15)        | 8.40E-05 | 9(15)        | 0.001849 | -              | -        | -             | -        | -            | -        | -            | -        | -            | -       | -            | -       | -            | -        | 2(15)        | 0.045878 |              |  |
| De novo fatty acid biosynthesis                           | -              | -          | 3(14)         | 1.68E-04 | 6(15)        | 1.68E-04 | 8(15)        | 2.52E-04 | 14(15)       | 8.40E-05 | 12(15)       | 9.24E-04 | 9(15)        | 0.001765 | 8(15)        | 3.36E-04 | 9(15)        | 0.001849 | -              | -        | -             | -        | -            | -        | -            | -        | -            | -       | -            | -       | -            | 3(15)    | 0.005714     |          |              |  |
| Leukotene metabolism                                      | -              | -          | -             | -        | 6(14)        | 0.00521  | 8(14)        | 0.00236  | 14(15)       | 8.40E-05 | 12(15)       | 9.24E-04 | 9(15)        | 0.001765 | 8(15)        | 3.36E-04 | 9(15)        | 0.001849 | -              | -        | -             | -        | -            | -        | -            | -        | -            | -       | -            | -       | -            | 2(14)    | 0.040061     |          |              |  |
| Porphyrin metabolism                                      | 1(6)           | 0.04445    | -             | -        | -            | -        | -            | -        | 4(6)         | 0.04277  | 4(6)         | 0.047811 | -            | -        | -            | -        | -            | -        | -              | -        | -             | -        | -            | -        | -            | -        | -            | -       | -            | -       | -            | -        | -            |          |              |  |
| Glycerophospholipid metabolism                            | 2(4)           | 5.88E-04   | -             | -        | -            | -        | -            | -        | 14(25)       | 0.009915 | -            | -        | -            | -        | -            | -        | -            | -        | -              | -        | -             | -        | -            | -        | -            | -        | -            | -       | -            | -       | -            | -        | -            |          |              |  |
| Keratan sulfate biosynthesis                              | -              | -          | -             | -        | -            | -        | -            | -        | -            | -        | -            | -        | -            | -        | -            | -        | -            | -        | -              | -        | -             | -        | -            | -        | -            | -        | -            | -       | -            | -       | -            | -        | -            |          |              |  |
| Proteoglycan biosynthesis                                 | -              | -          | -             | -        | -            | -        | -            | -        | -            | -        | -            | -        | -            | -        | -            | -        | -            | -        | -              | -        | -             | -        | -            | -        | -            | -        | -            | -       | -            | -       | -            | -        | -            |          |              |  |
| Androgen and estrogen biosynthesis and metabolism         | -              | -          | -             | -        | -            | -        | -            | -        | -            | -        | -            | -        | -            | -        | -            | -        | -            | -        | -              | -        | -             | -        | -            | -        | -            | -        | -            | -       | -            | -       | -            | -        | -            |          |              |  |
| Xenobiotics metabolism                                    | -              | -          | -             | -        | -            | -        | -            | -        | -            | -        | -            | -        | -            | -        | -            | -        | -            | -        | -              | -        | -             | -        | -            | -        | -            | -        | -            | -       | -            | -       | -            | -        | -            |          |              |  |
| Glycolysis and Gluconeogenesis                            | 2(6)           | 0.001092   | -             | -        | -            | -        | -            | -        | -            | -        | -            | -        | -            | -        | -            | -        | -            | -        | -              | -        | -             | -        | -            | -        | -            | -        | -            | -       | -            | -       | -            | -        | -            |          |              |  |
| Fructose and mannose metabolism                           | 2(6)           | 0.001092   | -             | -        | -            | -        | -            | -        | -            | -        | -            | -        | -            | -        | -            | -        | -            | -        | -              | -        | -             | -        | -            | -        | -            | -        | -            | -       | -            | -       | -            | -        | -            |          |              |  |
| Linoleate metabolism                                      | -              | -          | -             | -        | 4(17)        | 0.004958 | 7(17)        | 0.004201 | 12(17)       | 0.001512 | 10(17)       | 0.01941  | 7(17)        | 0.046971 | 7(17)        | 0.002773 | 7(17)        | 0.042349 | 4(17)          | 0.006722 | 4(17)         | 0.031426 | 3(17)        | 0.037896 | -            | -        | -            | -       | -            | -       | -            | 1(1)     | 0.008319     |          |              |  |
| Squalene and cholesterol biosynthesis                     | -              | -          | -             | -        | -            | -        | -            | -        | -            | -        | -            | -        | -            | -        | -            | -        | -            | -        | -              | -        | -             | -        | -            | -        | -            | -        | -            | -       | -            | -       | 1(1)         | 0.008319 | 1(1)         | 0.012268 |              |  |
| TCA cycle                                                 | -              | -          | -             | -        | -            | -        | -            | -        | 2(2)         | 0.040249 | 2(2)         | 0.04445  | -            | -        | -            | -        | -            | -        | -              | -        | -             | -        | -            | -        | -            | -        | -            | -       | -            | -       | -            | 1(3)     | 0.03714      |          |              |  |
| Phytanic acid peroxisomal oxidation                       | -              | -          | -             | -        | 2(7)         | 0.021511 | 4(7)         | 0.00521  | 5(7)         | 0.018906 | -            | -        | -            | -        | -            | -        | -            | -        | -              | -        | -             | -        | -            | -        | -            | -        | -            | -       | -            | -       | -            | -        | -            |          |              |  |
| Omega-3 fatty acid metabolism                             | -              | -          | -             | -        | 2(9)         | 0.034451 | -            | -        | 7(9)         | 0.004621 | 7(9)         | 0.006302 | 6(9)         | 0.003445 | -            | -        | -            | -        | -              | -        | -             | -        | -            | -        | -            | -        | -            | -       | -            | -       | -            | -        | -            |          |              |  |
| Mono-unsaturated fatty acid beta-oxidation                | -              | -          | -             | -        | -            | -        | -            | -        | -            | -        | -            | -        | -            | -        | -            | -        | -            | -        | -              | -        | -             | -        | -            | -        | -            | -        | -            | -       | -            | -       | -            | -        | -            |          |              |  |
| Limonene and pinene degradation                           | -              | -          | -             | -        | -            | -        | -            | -        | 7(9)         | 0.004621 | 7(9)         | 0.006302 | 6(9)         | 0.003445 | -            | -        | -            | -        | -              | -        | -             | -        | -            | -        | -            | -        | -            | -       | -            | -       | -            | -        | -            |          |              |  |
| Glycophospholipid metabolism                              | -              | -          | -             | -        | 1(2)         | 0.013192 | -            | -        | 9(16)        | 0.023527 | -            | -        | -            | -        | -            | -        | -            | -        | -              | -        | -             | -        | -            | -        | -            | -        | -            | -       | -            | -       | -            | -        | -            |          |              |  |
| C21-steroid hormone biosynthesis and metabolism           | 1(2)           | 0.018738   | 1(2)          | 0.005714 | -            | -        | -            | -        | -            | -        | -            | -        | -            | -        | -            | -        | -            | -        | -              | -        | -             | -        | -            | -        | -            | -        | -            | -       | -            | -       | -            | -        | -            |          |              |  |
| Methionine and cysteine metabolism                        | 2(8)           | 0.004369   | -             | -        | -            | -        | -            | -        | -            | -        | -            | -        | -            | -        | -            | -        | -            | -        | -              | -        | -             | -        | -            | -        | -            | -        | -            | -       | -            | -       | -            | -        | -            |          |              |  |
| Galactose metabolism                                      | -              | -          | -             | -        | -            | -        | -            | -        | -            | -        | -            | -        | -            | -        | -            | -        | -            | -        | -              | -        | -             | -        | -            | -        | -            | -        | -            | -       | -            | -       | -            | -        | -            |          |              |  |
| Arginine and Proline Metabolism                           | -              | -          | -             | -        | -            | -        | -            | -        | -            | -        | -            | -        | -            | -        | -            | -        | -            | -        | -              | -        | -             | -        | -            | -        | -            | -        | -            | -       | -            | -       | -            | -        | -            |          |              |  |
| N-Glycan Degradation                                      | 1(1)           | 0.004958   | -             | -        | -            | -        | -            | -        | -            | -        | -            | -        | -            | -        | -            | -        | -            | -        | -              | -        | -             | -        | -            | -        | -            | -        | -            | -       | -            | -       | -            | -        | -            |          |              |  |
| Sarch and Sucrose Metabolism                              | 1(1)           | 0.004958   | -             | -        | -            | -        | -            | -        | -            | -        | -            | -        | -            | -        | -            | -        | -            | -        | -              | -        | -             | -        | -            | -        | -            | -        | -            | -       | -            | -       | -            | -        | -            |          |              |  |
| Beta-Alanine metabolism                                   | 1(1)           | 0.004958   | -             | -        | -            | -        | -            | -        | -            | -        | -            | -        | -            | -        | -            | -        | -            | -        | -              | -        | -             | -        | -            | -        | -            | -        | -            | -       | -            | -       | -            | -        | -            |          |              |  |
| Glycophospholipid biosynthesis - globoseries              | 1(1)           | 0.004958   | -             | -        | -            | -        | -            | -        | -            | -        | -            | -        | -            | -        | -            | -        | -            | -        | -              | -        | -             | -        | -            | -        | -            | -        | -            | -       | -            | -       | -            | -        | -            |          |              |  |
| Keratan sulfate degradation                               | 1(1)           | 0.004958   | -             | -        | -            | -        | -            | -        | -            | -        | -            | -        | -            | -        | -            | -        | -            | -        | -              | -        | -             | -        | -            | -        | -            | -        | -            | -       | -            | -       | -            | -        | -            |          |              |  |
| Propanoate metabolism                                     | 1(1)           | 0.004958   | -             | -        | -            | -        | -            | -        | -            | -        | -            | -        | -            | -        | -            | -        | -            | -        | -              | -        | -             | -        | -            | -        | -            | -        | -            | -       | -            | -       | -            | -        | -            |          |              |  |
| Chondroitin sulfate degradation                           | 1(1)           | 0.004958   | -             | -        | -            | -        | -            | -        | -            | -        | -            | -        | -            | -        | -            | -        | -            | -        | -              | -        | -             | -        | -            | -        | -            | -        | -            | -       | -            | -       | -            | -        | -            |          |              |  |
| Glycine, serine, alanine and threonine metabolism         | 1(1)           | 0.004958   | -             | -        | -            | -        | -            | -        | -            | -        | -            | -        | -            | -        | -            | -        | -            | -        | -              | -        | -             | -        | -            | -        | -            | -        | -            | -       | -            | -       | -            | -        | -            |          |              |  |
| Heparan sulfate degradation                               | 1(1)           | 0.004958   | -             | -        | -            | -        | -            | -        | -            | -        | -            | -        | -            | -        | -            | -        | -            | -        | -              | -        | -             | -        | -            | -        | -            | -        | -            | -       | -            | -       | -            | -        | -            |          |              |  |
| Vitamin A (retinol) metabolism                            | 2(7)           | 0.005042   | -             | -        | -            | -        | -            | -        | -            | -        | -            | -        | -            | -        | -            | -        | -            | -        | -              | -        | -             | -        | -            | -        | -            | -        | -            | -       | -            | -       | -            | -        | -            |          |              |  |
| Fatty Acid Metabolism                                     | -              | -          | -             | -        | 2(11)        | 0.046551 | 4(11)        | 0.02546  | 5(7)         | 0.018906 | 7(11)        | 0.021679 | 5(11)        | 0.048819 | 5(11)        | 0.006134 | 5(11)        | 0.042013 | 2(7)           | 0.03025  | -             | -        | -            | -        | -            | -        | -            | -       | -            | -       | -            | -        | -            | -        |              |  |
| Aspartate and asparagine metabolism                       | -              | -          | -             | -        | -            | -        | -            | -        | 8(11)        | 0.005126 | -            | -        | -            | -        | -            | -        | -            | -        | -              | -        | -             | -        | -            | -        | -            | -        | -            | -       | -            | -       | -            | -        | -            |          |              |  |
| Tyrosine metabolism                                       | 1(3)           | 0.018822   | -             | -        | -            | -        | 5(17)        | 0.038232 | -            | -        | -            | -        | 4(5)         | 0.00521  | 7(17)        | 0.046971 | 3(5)         | 0.035123 | 1(3)           | 0.026973 | 1(3)          | 0.005966 | 1(3)         | 0.005966 | -            | -        | -            | -       | -            | -       | 2(5)         | 0.039997 |              |          |              |  |
| Glycophospholipid biosynthesis - ganglioseries            | 1(6)           | 0.028989   | 2(6)          | 0.008739 | -            | -        | -            | -        | -            | -        | -            | -        | -            | -        | -            | -        | -            | -        | -              | -        | -             | -        | -            | -        | -            | -        | -            | -       | -            | -       | -            | -        | -            |          |              |  |
| Phosphatidylchitol phosphate metabolism                   | -              | -          | -             | -        | 1(2)         | 0.03756  | 2(2)         | 0.00731  | 2(2)         | 0.040249 | 2(2)         | 0.04445  | 2(2)         | 0.019074 | 2(2)         | 0.007058 | 2(2)         | 0.01899  | 1(6)           | 0.035543 | 2(6)          | 0.017982 | 1(3)         | 0.005966 | 2(6)         | 0.020334 | -            | -       | -            | -       | 5(6)         | 0.006302 |              |          |              |  |
| Polysaturated fatty acid biosynthesis                     | -              | -          | -             | -        | -            | -        | -            | -        | -            | -        | -            | -        | -            | -        | -            | -        | -            | -        | -              | -        | -             | -        | -            | -        | -            | -        | -            | -       | -            | -       | -            | -        | -            |          |              |  |
| Putative anti-Inflammatory metabolites formation from EPA | 1(3)           | 0.027057   | -             | -        | -            | -        | -            | -        | 1(1)         | 0.008319 | 3(3)         | 0.016721 | 1(1)         | 0.008823 | -            | -        | -            | -        | -              | -        | -             | -        | -            | -        | -            | -        | -            | -       | -            | -       | -            | -        | -            |          |              |  |
| Carbon fixation                                           | -              | -          | -             | -        | -            | -        | -            | -        | -            | -        | -            | -        | -            | -        | -            | -        | -            | -        | -              | -        | -             | -        | -            | -        | -            | -        | -            | -       | -            | -       | -            | -        | -            |          |              |  |
| Bioprtin metabolism                                       | -              | -          | -             | -        | -            | -        | -            | -        | -            | -        | -            | -        | -            | -        | -            | -        | -            | -        | -              | -        | -             | -        | -            | -        | -            | -        | -            | -       | -            | -       | -            | -        | -            |          |              |  |
| Drug metabolism - cytochrome P450                         | -              | -          | 1(1)          | 0.010419 | -            | -        | 1(2)         | 0.009999 | 1(2)         | 0.018654 | -            | -        | 1(1)         | 0.025292 | -            | -        | -            | -        | -              | -        | -             | -        | -            | -        | -            | -        | -            | -       | -            | -       | -            | 1(2)     | 0.024704     |          |              |  |
| Parathio degradation                                      | -              | -          | -             | -        | -            | -        | -            | -        | -            | -        | -            | -        | -            | -        | -            | -        | -            | -        | -              | -        | -             | -        | -            | -        | -            | -        | -            | -       | -            | -       | -            | -        | -            |          |              |  |
| Ascorbate (Vitamin C) and Aldarate Metabolism             | -              | -          | -             | -        | -            | -        | -            | -        | -            | -        | -            | -        | -            | -        | -            | -        | -            | -        | -              | -        | -             | -        | -            | -        | -            | -        | -            | -       | -            | -       | -            | -        | -            |          |              |  |
| Vitamin D                                                 | -              | -          | -             | -        | -            | -        | -            | -        | -            | -        | -            | -        | -            | -        | -            | -        | -            | -        | -              | -        | -             | -        | -            | -        | -            | -        | -            | -       | -            | -       | -            | -        | -            |          |              |  |
| Lysine metabolism                                         | -              | -          | -             | -        | -            | -        | -            | -        | -            | -        | -            | -        | -            | -        | -            | -        | -            | -        | -              | -        | -             | -        | -            | -        | -            | -        | -            | -       | -            | -       | -            | -        | -            |          |              |  |
| S-Branchd dilaic acid metabolism                          | -              | -          | -             | -        | -            | -        | -            | -        | -            | -        | -            | -        | -            | -        | -            | -        | -            | -        | -              | -        | -             | -        | -            | -        | -            | -        | -            | -       | -            | -       | -            | -        | -            |          |              |  |
| Prostaglandin formation from arachidonate                 | 2(10)          | 0.012688   | 1(10)         | 0.033695 | 2(10)        | 0.039913 | -            | -        | -            | -        | -            | -        | -            | -        | -            | -        | -            | -        | -              | -        | -             | -        | -            | -        | -            | -        | -            | -       | -            | -       | -            | -        | -            |          |              |  |
| N-Glycan biosynthesis                                     | 1(2)           | 0.013192   | -             | -        | -            | -        | -            | -        | -            | -        | -            | -        | -            | -        | -            | -        | -            | -        | -              | -        | -             | -        | -            | -        | -            | -        | -            | -       | -            | -       | -            | -        | -            |          |              |  |
| Pyruvate Metabolism                                       | 1(2)           | 0.013192   | -             | -        | -            | -        | -            | -        | -            | -        | -            | -        | -            | -        | -            | -        | -            | -        | -              | -        | -             | -        | -            | -        | -            | -        | -            | -       | -            | -       | -            | -        | -            |          |              |  |
| Salic acid metabolism                                     | 1(2)           | 0.013192   | -             | -        | -            | -        | -            | -        | -            | -        | -            | -        | -            | -        | -            | -        | -            | -        | -              | -        | -             | -        | -            | -        | -            | -        | -            | -       | -            | -       | -            | -        | -            |          |              |  |
| Di-unsaturated fatty acid beta-oxidation                  | -              | -          | -             | -        | -            | -        | -            | -        | -            | -        | -            | -        | -            | -        | -            | -        | -            | -        | -              | -        | -             | -        | -            | -        | -            | -        | -            | -       | -            | -       | -            | -        | -            |          |              |  |
| Urea cycle/amino group metabolism                         | -              | -          | -             | -        | -            | -        | -            | -        | -            | -        | -            | -        | -            | -        | -            | -        | -            | -        | -              | -        | -             | -        | -            | -        | -            | -        | -            | -       | -            | -       | -            | -        | -            |          |              |  |
| Prostaglandin formation from dihom gamma-linoelic acid    | -              | -          | -             | -        | -            | -        | -            | -        | -            | -        | -            | -        | -            | -        | -            | -        | -            | -        | -              | -        | -             | -        | -            | -        | -            | -        | -            | -       | -            | -       | -            | -        | -            |          |              |  |
| Hexose phosphorylation                                    | 1(4)           | 0.024032   | -             | -        | -            | -        | -            | -        | -            | -        | -            | -        | -            | -        | -            | -        | -            | -        | -              | -        | -             | -        | -            | -        | -            | -        | -            | -       | -            | -       | -            | -        | -            |          |              |  |
| Carnitine shuttle                                         | -              | -          | -             | -        | -            | -        | -            | -        | -            | -        | -            | -        | -            | -        | -            | -        | -            | -        | -              | -        | -             | -        | -            | -        | -            | -        | -            | -       | -            | -       | -            | -        | -            |          |              |  |
| Pyrimidine metabolism                                     | 1(5)           | 0.039156</ |               |          |              |          |              |          |              |          |              |          |              |          |              |          |              |          |                |          |               |          |              |          |              |          |              |         |              |         |              |          |              |          |              |  |

Supplementary Table 4B : Lipidomics mode Pathway analysis as obtained from Mummichog v2.0.6

[illegible]

[illegible]
